# 1 In the Body's Eye

## 2 The Computational Anatomy of Interoceptive Inference

3 Micah Allen<sup>1,2,3</sup>, Andrew Levy<sup>4</sup>, Thomas Parr<sup>4</sup>, Karl J. Friston<sup>4</sup>

4

5 <sup>1</sup>Aarhus Institute of Advanced Studies, Aarhus University, Denmark

6 <sup>2</sup>Centre of Functionally Integrative Neuroscience, Aarhus University Hospital, Denmark

7 <sup>3</sup>Cambridge Psychiatry, Cambridge University, Cambridge UK

8 <sup>4</sup>Wellcome Centre for Human Neuroimaging, UCL

9

### 10 **Abstract**

11

12 A growing body of evidence highlights the intricate linkage of exteroceptive perception to  
13 the rhythmic activity of the visceral body. In parallel, interoceptive inference theories of  
14 emotion and self-consciousness are on the rise in cognitive science. However, thus far no  
15 formal theory has emerged to integrate these twin domains; instead most extant work is  
16 conceptual in nature. Here, we introduce a formal model of cardiac active inference, which  
17 explains how ascending cardiac signals entrain exteroceptive sensory perception and  
18 confidence. Through simulated psychophysics, we reproduce the defensive startle reflex and  
19 commonly reported effects linking the cardiac cycle to fear perception. We further show that  
20 simulated ‘interoceptive lesions’ blunt fear expectations, induce psychosomatic  
21 hallucinations, and exacerbate metacognitive biases. Through synthetic heart-rate  
22 variability analyses, we illustrate how the balance of arousal-priors and visceral prediction  
23 errors produces idiosyncratic patterns of physiological reactivity. Our model thus offers the  
24 possibility to computationally phenotype disordered brain-body interaction.

25

26

### 27 **Introduction**

28 The enactive view of perception – implied by active vision and inference – suggests  
29 an intimate co-dependency between perception and the active sampling of our sensorium.

30 In this work, we take the embodied view to its ultimate conclusion and consider perception  
31 as a function of the physical and physiological body we use to ‘measure’ the world. In  
32 particular, our focus is on the coupling – or interaction – between interoceptive and  
33 exteroceptive perception; namely, how bodily states and states of affairs beyond the body  
34 are inferred – and how inference about each domain affects the other. For example, does  
35 what we see depend upon our autonomic status and how does visual perceptual synthesis  
36 affect sympathetic or parasympathetic outflow? The body is, in essence, an ensemble of  
37 fluctuating systems with biorhythms nested at multiple timescales. How then do these  
38 physiological fluctuations interact with perceptual synthesis in the visual and auditory  
39 domains?

40         There is a rapidly growing body of evidence suggesting that bodily and autonomic  
41 states affect perceptual and metacognitive decisions (Allen et al., 2016b; Azevedo et al., 2017;  
42 Bonvallet and Bloch, 1961; Cohen et al., 1980; Garfinkel et al., 2014; Hauser et al., 2017b;  
43 Lacey and Lacey, 1978; Park et al., 2014; Salomon et al., 2016; Velden and Juris, 1975; Zelano  
44 et al., 2016). Much of this evidence emphasises the dynamic aspect of our physiology; usually  
45 assessed in terms of how psychophysics depends upon the phase of some physiological cycle.  
46 Most of the empirical evidence suggests that biorhythms gate or modulate the way that  
47 sensory evidence is accumulated during perception (Bonvallet et al., 1954; Bonvallet and  
48 Bloch, 1961; Karavaev et al., 2018; Varga and Heck, 2017). In the predictive coding literature,  
49 this is usually treated as fluctuating, context sensitive, changes in the precision of sensory  
50 sampling (e.g., the precision or gain of prediction errors). Clear examples of this include the  
51 fast waxing and waning of precision during active visual sampling. For example, saccadic  
52 suppression – during saccadic eye movements – alternates with attention to fixated visual  
53 information every 250 ms or so. This process of actively sampling the environment via  
54 ballistic saccade itself varies with the cardiac cycle (Galvez-Pol et al., 2018; Kunzendorf et al.,  
55 2019; Ohl et al., 2016). At still slower timescales, respiratory (Herrero et al., 2017; Tort et al.,  
56 2018b, 2018a; Zelano et al., 2016) are coupled to neuronal oscillations and behavior. In  
57 short, at probably every timescale there are systematic fluctuations in the precision or  
58 quality of sensory evidence that depend upon when we actually interrogate the world, in  
59 relation to the biorhythms of our sensory apparatus; namely, our body.

60 Our focus on the multimodal integration of interoceptive and exteroceptive domains  
61 is driven by the overwhelming evidence for interoception as a key modality in hedonics,  
62 arousal, emotion and selfhood (Allen and Friston, 2018; Apps and Tsakiris, 2014; Gallagher  
63 and Allen, 2018; Seth, 2013; Seth and Friston, 2016). This is generally treated under the  
64 rubric of interoceptive inference; namely, active inference in the interoceptive domain.  
65 There are several compelling formulations of interoceptive inference from the perspective  
66 of neurophysiology, neuroanatomy and, indeed, issues of consciousness in terms of minimal  
67 selfhood. However, much of this treatment rests upon a purely conceptual analysis –  
68 underpinned by some notion of active (Bayesian) inference about states of the world  
69 (including the body). In this work, we offer a more formal (mathematical) analysis that we  
70 hope will be a point of reference for both theoretical and empirical investigations.

71 In brief, we constructed a (minimal) active inference architecture to simulate  
72 embodied perception and concomitant arousal. Here, we focused on simulating interactions  
73 between the cardiac cycle and exteroceptive perception. In principle however, our  
74 simulation provides a computational proof-of-principle that can be expanded to understand  
75 brain-body coupling at any physiological or behavioral timescale. Using a Markov decision  
76 process formulation, we created a synthetic subject who exhibited physiological (cardio-  
77 acceleration) responses to arousing stimuli. Our agenda was twofold: first, to provide a  
78 sufficiency proof that – in at least one example – the interaction between interoception and  
79 exteroception emerges from the normative (formal) principles of active inference.  
80 Furthermore, having an *in silico* subject at hand, means that we can simulate the effects of  
81 various disconnections and pathophysiology. For example, we can examine the effect of  
82 deafferentation of interoceptive signals on arousal, exteroceptive perception, and  
83 (metacognitive) confidence placed in perceptual categorization. Indeed, we were able to go  
84 beyond simulated deafferentation studies and ask what it would be like if we were able to  
85 selectively lesion the precision of (i.e. confidence ascribed to) different sorts of beliefs; for  
86 example, beliefs about ‘what I am doing’, beliefs about ‘the state of the world’, and beliefs  
87 about ‘the sorts of interoceptive and exteroceptive signals I expect to encounter’.

88 Second, we constructed our synthetic subject in such a way that the same paradigm  
89 could be replicated in real subjects. The motivation for this is that the active inference  
90 scheme used below has an associated process theory (Friston et al., 2017a). In other words,

91 neuronal and behavioral responses associated with inferential processes can be simulated  
92 on a trial by trial basis. This means that we can use electrophysiological, eye tracking,  
93 pupillometry and other physiological proxies to test various hypotheses that can be  
94 instantiated in the model. Crucially, this provides a link between neuronal and behavioural  
95 responses – as characterised by the latency between stimuli onset and autonomic responses  
96 (e.g., heart rate acceleration or variability) or confidence judgements (i.e., responses to how  
97 confident were you in your perceptual judgement?). In this paper, we will focus on the basic  
98 phenomenology and (some counterintuitive) results. In subsequent work, we will use this  
99 formalism to model real responses under various experimental manipulations.

100 In what follows, we briefly describe the generative model and inversion scheme used  
101 to simulate cardiac arousal responses. We then demonstrate the results of anatomical  
102 (deafferentation) lesions on perceptual and metacognitive behaviour, as well as simulated  
103 belief updating. Finally, we will examine the effects on synthetic heart-rate variability when  
104 changing the precision of various prior beliefs that underlie perceptual inference. We  
105 conclude with a discussion of the implications for existing research in this area – and how  
106 this research could be informed by a formal approach providing guidelines to discovery.

107

108

## 109 **Methods**

110

### 111 *Markov Decision Process*

112

113 The simulations reported below build upon the notion of active inference. This is a ‘first-  
114 principles’ approach to understanding (Bayes) optimal behaviour. Simply put, active  
115 inference treats the brain as using an internal (generative) model of the world to explain  
116 exteroceptive, proprioceptive, and interoceptive sensory data. By optimizing beliefs about  
117 variables in this model (perceptual inference), or by changing their internal or external

118 environment (action), creatures can ensure their sensations and prior beliefs are consistent<sup>1</sup>.  
119 A Markov decision process (MDP) is a form of probabilistic generative model that describes  
120 the sequential dynamics of unobserved (hidden) variables (e.g., the current state of the  
121 cardiac cycle) and the sensations they cause (e.g., baroreceptor signals). The hidden  
122 variables of an MDP are hidden states ( $s_t$ ) and sequences of actions or policies ( $\pi$ ). The  
123 generative model then embodies the conditional dependencies between these variables, as  
124 expressed graphically in Figure 1. While we provide a brief overview here, we refer readers  
125 to (Friston et al., 2017a) for more technical detail.

126  
127 Hidden states generate observable sensory data with probabilities expressed in a likelihood  
128 matrix **A**. The states evolve through time according to a transition probability matrix, **B** and  
129 depend only on the state at the previous time, and on the policy,  $\pi$ . Finally, we equip the  
130 generative model with preferences (**C**), prior beliefs about initial states (**D**), and prior beliefs  
131 about policies. Beliefs about policies have two parts. The first of these is a fixed bias (**E**). This  
132 may be thought of as a habit; i.e., ‘what I expect to do’ *a priori*. The second is a belief that the  
133 most probable policies are those that have the lowest expected free energy (**G**); i.e., ‘what I  
134 expect to do’ after considering the consequences of action. A simple intuition for the latter is  
135 to think of the selection between alternative courses of action as we might think of Bayesian  
136 hypothesis testing (i.e. model comparison); namely, planning as inference (Attias, 2003;  
137 Botvinick and Toussaint, 2012). Here, each policy can be thought of as an alternative  
138 hypothesis about ‘how I am going to behave’. These are evaluated in terms of prior beliefs  
139 (**E**), and the (predicted) evidence future data affords (**G**). Just as free energy is used to  
140 approximate the evidence data affords a hypothesis, expected free energy evaluates the  
141 expected evidence, under beliefs about how data are actively generated. As expressed in  
142 Figure 1, expected free energy can be separated into two parts. ‘Risk’ quantifies how far  
143 predicted observations deviate from preferred outcomes. Minimizing this ensures  
144 maintenance of homeostasis. ‘Ambiguity’ quantifies the uncertainty in the mapping from

---

<sup>1</sup> The term ‘belief’ here is used in the technical sense of a Bayesian belief, or probability distribution, typically considered to be sub-personal.

145 states to outcomes. Minimizing this component ensures that salient, uncertainty-resolving  
 146 data are sought (leading to epistemic, information gathering, behavior).

147

148

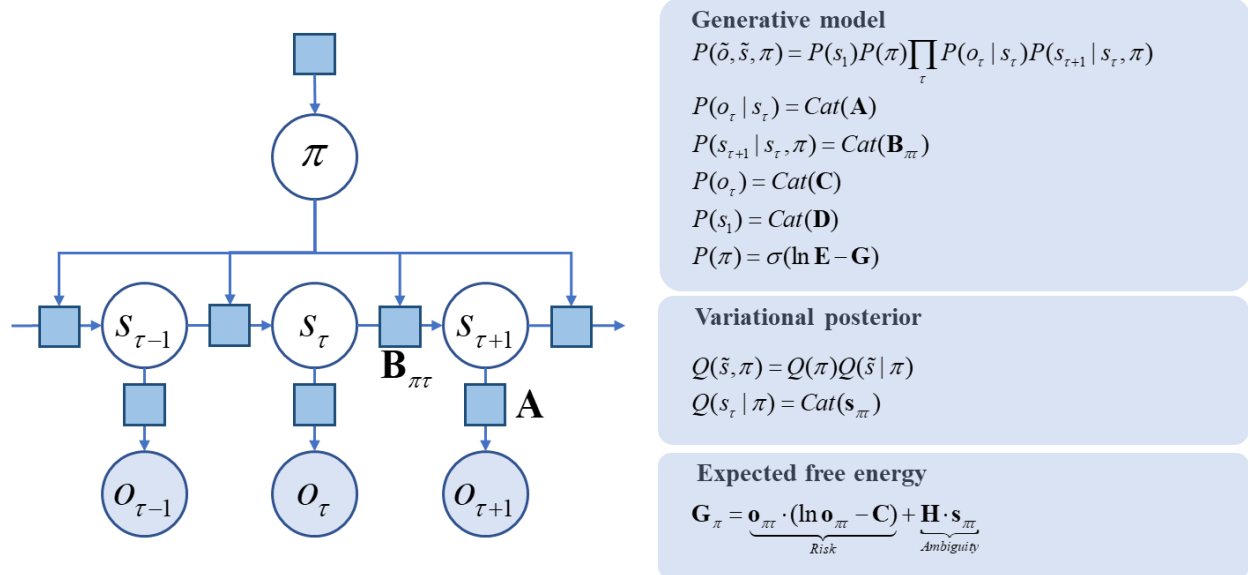

149

150 **Figure 1.** A Markov decision process generative model: the factor graph *on the left* illustrates the  
 151 conditional dependencies, and independencies, between the variables in the generative model (see the main  
 152 text for a description of the variables). The variables are shown in circles (with filled circles showing observable  
 153 variables). An arrow from one variable to another indicates that the latter depends upon the former. The square  
 154 nodes each represent probability distributions. The panels *on the right* give the forms of the distributions  
 155 (associated with each square node) in the generative model, in addition to defining the expected free energy,  
 156 and specifying the factorization of the approximate posterior (variational) distributions the agent possesses.

157

158

159 *Synthetic Cardiac Arousal*

160

161 Using the MDP scheme detailed above, we set out to simulate a cardiac arousal  
 162 response to threatening stimuli (e.g., a vicious looking spider), in comparison to non-  
 163 arousing stimuli (e.g., some flowers). To do this, we had to define ‘arousal’ and its  
 164 interoceptive correlates. To keep things as simple as possible, we assumed the subject’s  
 165 generative model included two sorts of hidden states (*interoceptive* and *exteroceptive* – and

166 that she could adopt two modes of engagement with the world (*relaxed* and *aroused*). These  
167 sorts of generative models are generally cast as Markov decision processes, whereby  
168 transitions among (hidden) states generate observable outcomes in one or more modalities.  
169 The modalities considered here were *exteroceptive* (*non-arousing* versus *arousing* visual  
170 stimuli) and *interoceptive* (the cardiac phase; *diastolic* or *systolic*). Having defined the nature  
171 of the state space generating outcomes, this model can then be parameterised in a relatively  
172 straightforward fashion as outlined above. For any set of **A,B,C,D**, and **E** parameters, one can  
173 then simulate active inference using standard marginal message passing schemes (Parr et  
174 al., 2019) to optimize expectations about hidden states of the world – and the action or policy  
175 currently being pursued (technically, a policy is a sequence of actions. In what follows, we  
176 only consider policies with one action) (Friston et al., 2017a, 2017c).

177         Crucially, inference about policies rest upon prior beliefs that the policies will  
178 minimise expected free energy in the future. This expected free energy has both epistemic  
179 and instrumental terms; namely; the ability of any particular course of action to resolve  
180 uncertainty about hidden states (known as salience, Bayesian surprise, information gain,  
181 *etc.*) (Barto et al., 2013; Itti and Baldi, 2009; Oudeyer and Kaplan, 2009; Schmidhuber, 2010)  
182 and the pragmatic affordance (known as expected value, utility, reward, *etc.*) as specified by  
183 the prior preferences (Friston et al., 2015).

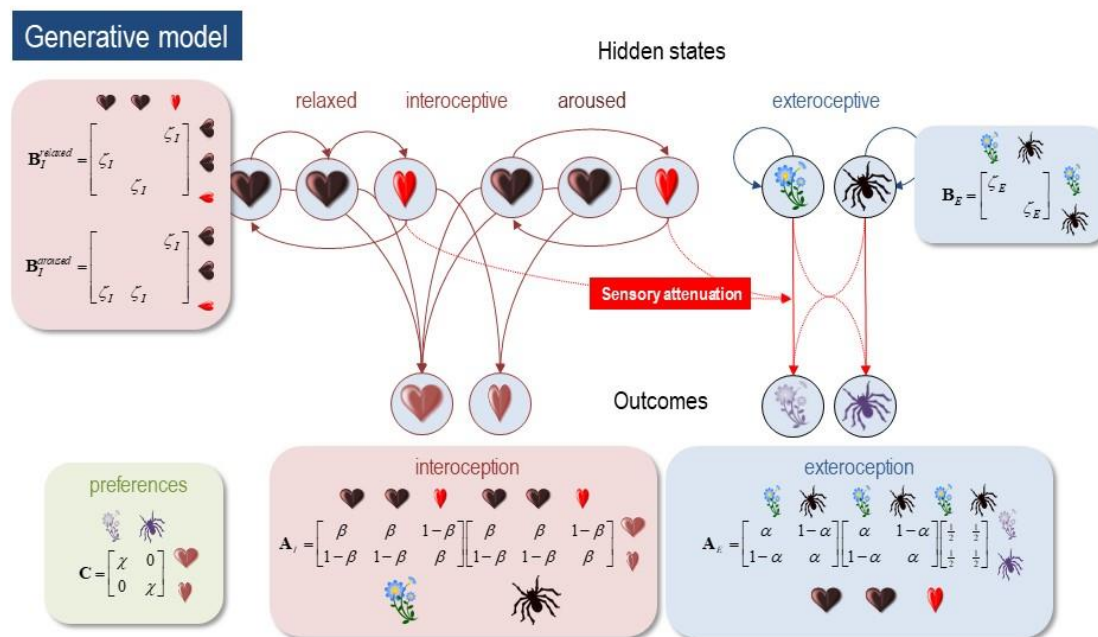

184  
 185 **Figure 2: the generative model.** This schematic illustrates how hidden states cause each other and  
 186 sensory outcomes in the interoceptive and exteroceptive domain. The upper row describes the probability  
 187 transitions among hidden states, while the lower row specifies the outcomes that would be generated by  
 188 combinations of hidden states that are inferred on the basis of outcomes. The green panel specifies the models  
 189 prior preferences; namely, the sorts of outcomes it expects to encounter. Please see main text for a full  
 190 explanation. Although this figure portrays interoceptive and exteroceptive outcomes as separate modalities,  
 191 they were in fact modelled as combinations – so that the prior preferences could be evaluated (this is necessary  
 192 because the preferred physiological outcome depends upon the visual cue). In this model, the precisions are  
 193 denoted by Greek letters and control the fidelity of various probabilistic mapping is (i.e., the likelihood or **A**  
 194 matrices and the transition or **B** matrices).

195  
 196 To capture the fundamentals of multimodal integration – of interoceptive and exteroceptive  
 197 modalities – we assumed the following, reasonably plausible, form for the model. The  
 198 synthetic subject had to infer which of two policies she was pursuing: a *relaxed* policy or an  
 199 *aroused* policy. These are defined operationally in terms of transitions among interoceptive  
 200 states. Here, we model this in terms of two distinct forms of cardiac cycling among *diastolic*  
 201 and *systolic* bodily states. When *relaxed*, the probability transitions among cardiac states



202 meant that there were two phases of *diastole* and one of *systole*. Conversely, when *aroused*,  
203 the first *diastolic* state jumped immediately to *systole*. In brief, this means that being aroused  
204 causes cardiac acceleration and the average amount of time spent in *systole*. The outcomes  
205 are generated by these states were isomorphic; in other words, there was a simple likelihood  
206 mapping from states to sensations; such that the subject received a precise or imprecise  
207 interoceptive cue about the current cardiac status (i.e., *diastole* or *systole*).

208         On the exteroceptive side, we just considered two states of the visual world; namely,  
209 the subject was confronting an *arousing* or *non-arousing* visual object. The corresponding  
210 visual modality again had two levels (*arousing* versus *non-arousing* picture). Crucially, the  
211 fidelity or precision of this mapping depended upon the interoceptive state. When the  
212 subject was in *systole*, this mapping became very imprecise. In other words, all outcomes  
213 were equally plausible under each hidden state of the visual world. Conversely, during  
214 *diastole*, there was a relatively precise likelihood mapping. This is the crucial part of our  
215 model that links the state of the body to the way that it samples the world. Put simply, precise  
216 visual information is only available during certain parts of the cardiac cycle, which itself  
217 depends upon the state of arousal (i.e., the policy currently inferred and selected). This can  
218 be thought of as a simple approximation of cardiac and other bodily timing effects, expressed  
219 as a momentary occlusion or attenuation of sensory input by (for example) afferent  
220 inhibitory baroreceptor effects (Bonvallet and Bloch, 1961; Lacey and Lacey, 1978), or by  
221 the brief flooding of the retina during cardiac contraction.

222         This simple structure produced some remarkable results that speak to the intimate  
223 relationship between interoception and exteroception. These phenomena (see below) rest  
224 upon the final set of beliefs; namely, preferred outcomes. Here, the subject believed that she  
225 would be, on average, in a *systolic* state when confronted with an arousing picture and in a  
226 *diastolic* state otherwise. These minimal prior preferences then present the subject with an  
227 interesting problem. She has to choose between extending periods of precise evidence  
228 accumulation (i.e., a *relaxed* state with more *diastolic* episodes) and sacrificing precise  
229 information, via cardio-acceleration, should she infer there is something arousing ‘out there’.  
230 However, to infer what is ‘out there’, she has to resolve her uncertainty, through epistemic  
231 foraging; i.e., maintaining a *relaxed* state. We therefore hypothesised that at the beginning of

232 each trial or exposure to a picture<sup>2</sup>, subjects would be preferentially in a relaxed state until  
233 they had accumulated sufficient evidence to confidently infer the visual object was *arousing*  
234 or not. If *arousing*, she would then infer herself to be aroused and enter into a period of  
235 cardio-acceleration (illustrated in Figure 3).

236 By carefully adjusting the precision of sensory evidence (through adjusting the **A**  
237 matrix), we could trade-off the evidence accumulation against these imperatives to simulate  
238 the elaboration of an arousing response to, and only to, *arousing* stimuli. Furthermore, we  
239 anticipated that a failure to implement a selected policy of arousal would both confound  
240 inference about the policy being pursued (i.e., an aroused state of mind) and – importantly –  
241 confidence about the exteroceptive state of affairs. The latter can be measured quantitatively  
242 in terms of the entropy or average uncertainty over hidden exteroceptive states (after taking  
243 a Bayesian model average over policies). This leads to the prediction that confidence in  
244 perceptual categorisation would not only evolve over time but would depend upon  
245 interoceptive inference. We tested this hypothesis *in silico* through various lesion  
246 experiments reported in the subsequent sections (Figures 3 - 5). In what follows, we  
247 illustrate the belief updating and arousal responses under ‘normal’ priors (i.e. precisions)  
248 based upon the generative model above (summarized graphically in Figure 2).

#### 249 *Simulations*

250 We implemented a minimal model of interoceptive and emotional inference – in the sense  
251 that one's state of active engagement with the world may be inferred from its interoceptive  
252 and exteroceptive consequences. In this minimal model, the two domains of perception are  
253 coupled by – and only by – sensory attenuation: i.e., attenuation of sensory precision in the  
254 visual domain during (inferred) systole. Precision refers to the reliability or confidence  
255 ascribed to a given probabilistic belief. Within this model there are four kinds of precision;  
256 namely, sensory precision in the visual ( $\alpha$ ) and cardiac ( $\beta$ ) domains and the precision of state  
257 transitions among interoceptive and exteroceptive states. For clarity, we will refer to the  
258 precision of transitions as (inverse) *volatility* and use *precision* to refer to sensory (i.e.

---

<sup>2</sup> Every simulation started off with a weak prior over hidden states that the picture was not arousing – and a weaker prior in favor of the *relaxed* policy.

259 likelihood) precision. In this example, because there are only two states, the corresponding  
 260 parameters of the generative model control both the expected contingencies and their  
 261 precision. In other words, when  $\alpha$  (or  $\beta$ ) decreases to  $1/2$ , sensory signals become imprecise  
 262 and completely ambiguous. In what follows, we will focus on manipulations of precision  
 263 under a canonical volatility of  $\zeta = 0.9$ . In other words, we will assume that our synthetic  
 264 subject believes state transitions among phases of the cardiac cycle follow each other fairly  
 265 reliably with a 90% probability. Similarly, if there is a flower ‘out there’, then there is a 90%  
 266 probability that it will remain there at the next sample. Cardiac and visual stimuli were  
 267 generated by the same precisions and volatilities as assumed by the subject’s generative  
 268 model.

269 We conducted three sets of simulations to illustrate the sorts of behaviours that  
 270 emerge under this active inference scheme – and to establish the construct validity of the  
 271 model in relation to empirical phenomena that speak to the influence of interoception on  
 272 exteroception and *vice versa*. This enabled us to illustrate the basic phenomenology of our  
 273 agent – in terms of simulated perceptual inference and cardiac physiology – under some  
 274 differing levels of sensory precision.

275

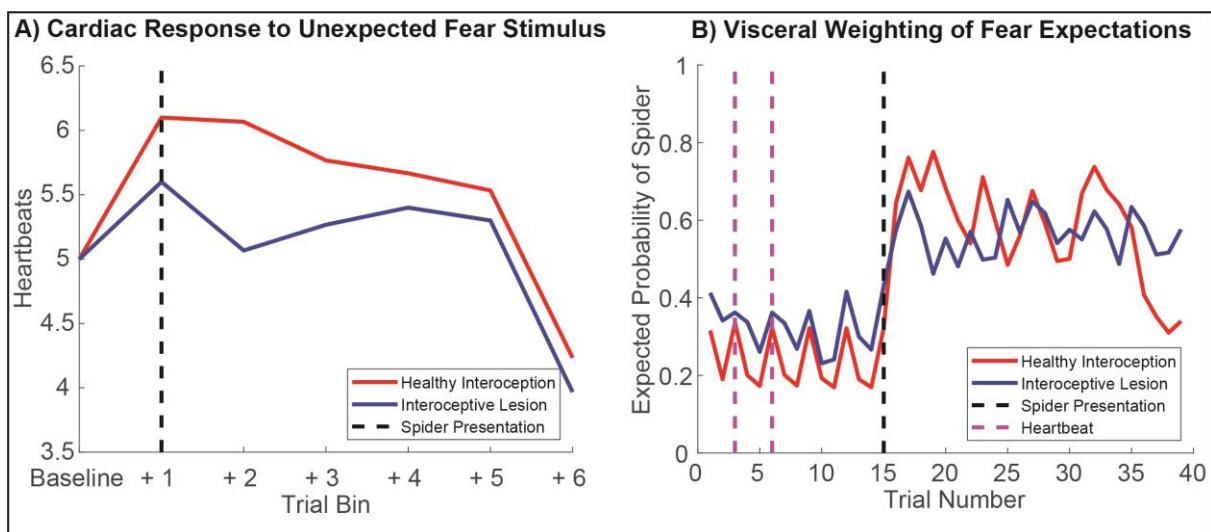

276

277 **Figure 3. Simulated Physiology and Perceptual Inference.** To establish the face validity of our  
 278 model, we first set out to reproduce some basic psychophysiological phenomenology and establish how these  
 279 phenomena change under ‘healthy’ (i.e., normative) versus ‘visceral lesion’ parameter settings. To do so, we fed  
 280 agents a fixed sequence of cardiac and exteroceptive stimuli, such that the first 14 trials constituted a ‘baseline’  
 281 period of cardiac quiescence (i.e., a steady heart rate), in the absence of arousing stimuli. On the 15th trial, an

282 unexpected arousing stimulus (a ‘spider’) is presented and a further 85 trials simulated. This simulation was  
283 repeated for 60 simulated participants, each with randomized starting values, half of which had ‘lesioned’  
284 interoceptive precision ( $\beta = 0.5$ , blue lines). Under these conditions our synthetic subjects exhibit a clear  
285 ‘startle’ or ‘defense’ reflex (Graham and Clifton, 1966; Sokolov, 1963), characterized by an immediate cardio-  
286 acceleration (left panel) and a dramatic shift in the posterior expectation of encountering another threatening  
287 stimulus. Interestingly, during the baseline period the posterior expectation of encountering a threat stimulus  
288 oscillates with the heartbeat; i.e., the lesioned subjects show both an attenuation of the cardiac response and a  
289 blunted belief update. Note that for the right panel, only trials 1-40 are shown. On the left, blue lines show  
290 summed heartbeats (time spent in systole) for 15-trial bins; on the right, lines depict the median posterior  
291 probability that the agent will see a spider on the next trial. See *Methods* and *Results* for more details.

292  
293 In the first set of simulations (Fig. 3), we focused on the physiological and psychological  
294 response to arousing stimuli. To do so, we tested the hypothesis that the unexpected  
295 presentation of a ‘spider’ would induce an aroused state – as reflected in an increased heart  
296 rate – and a greater posterior expectation of encountering an arousing spider stimulus on  
297 the next trial. To evaluate this hypothesis, we supplied the subject with a fixed sequence of  
298 15 stimuli – in both the cardiac and visual domains – and examined the posterior beliefs  
299 about the next exteroceptive state following a period of relaxed cardiac input. Note that this  
300 is possible precisely because our generative model includes beliefs about the future –  
301 including the next hidden state and subsequent sensory sample. Here, we used as outcome  
302 measures the agent’s evoked cardiac acceleration response (calculated by binning the  
303 number of diastole events across the experiment) and the agent’s posterior belief that the  
304 next stimulus would be threatening. These simulations were repeated 60 times with  
305 randomized starting values, such that the first thirty ‘healthy’ agents were compared to an  
306 ‘interoceptive lesion’ group for whom interoceptive precision had been attenuated ( $\beta = 0.5$ ).  
307 This enabled us to not only establish the interaction of fear expectations and cardiac arousal,  
308 but also to demonstrate how these responses change when interoceptive sensory precision  
309 is ablated.

310 In the second set of simulations (Fig. 4), our focus moved from perceptual to  
311 metacognitive inference. Here, we examined the interaction between exteroceptive and  
312 interoceptive sensory precision on the one hand and their coupling to cardiac timing and  
313 metacognition (posterior confidence) on the other. Our goal here was to illustrate how both

314 interoceptive and exteroceptive precision interact to influence metacognitive inference, and  
315 to link these to empirical findings showing that cardiac arousal biases metacognition (Allen  
316 et al., 2016b; Hauser et al., 2017a). For these, we used the uncertainty about inferred  
317 exteroceptive and interoceptive states (as quantified by the summed entropy of posterior  
318 beliefs for each state) as outcome measures, simulated under a range of cardiac and visual  
319 precision settings (figure 3A). To further illustrate how these effects oscillate with the  
320 cardiac rhythm, we separated these measures for each phase of the cardiac cycle (early  
321 diastole, late diastole, systole). We then repeated these analyses comparing ‘healthy’  
322 interoceptive inference agents ( $\alpha$  &  $\beta = 0.9$ ), to agents for whom either exteroceptive or  
323 interoceptive precision was lesioned ( $\alpha$  or  $\beta = 0.5$ , respectively). In virtue of our coupling of  
324 exteroceptive sensory precision to the cardiac cycle, we anticipated that metacognitive  
325 confidence (outscored by the negative entropy of posterior beliefs) would depend on the  
326 precision of both interoceptive and exteroceptive states, and that this effect would clearly  
327 oscillate with the cardiac cycle. Further, we expected in the extreme case of our ‘lesioned’  
328 subjects, these effects would be further exacerbated such that interoceptive and  
329 exteroceptive uncertainty would increase dramatically, under their respective lesion  
330 conditions.  
331

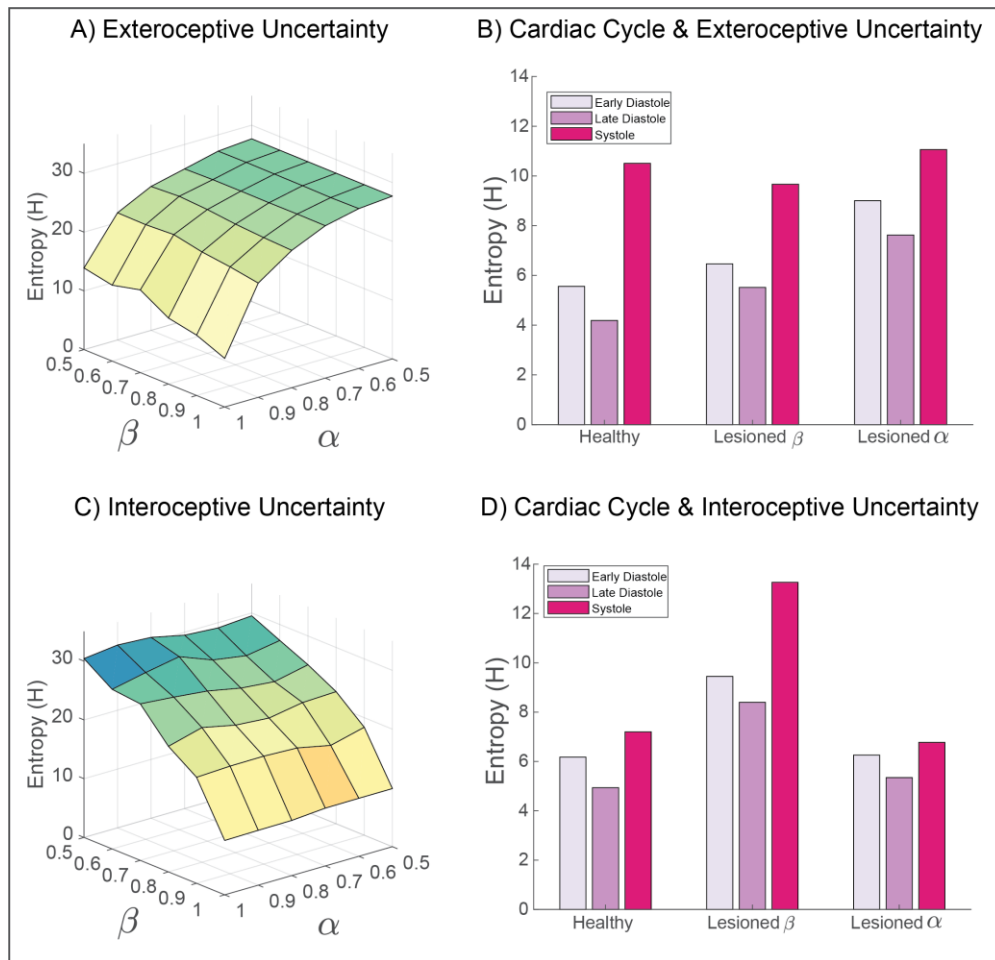

332

333

334

335

336

337

338

339

340

341

342

343

344

345

346

347

**Figure 4.** Simulating the influence of interoceptive and exteroceptive precision on metacognitive uncertainty. To explore how interoceptive inference influences metacognition, we measured the summed entropy of beliefs for both exteroceptive (top panels) and interoceptive (bottom panels) states. By simulating the full range of sensory precision values, from lesioned precision ( $\alpha$  or  $\beta = 0.5$ ) to ‘hyper-precision’ ( $\alpha$  or  $\beta = 1$ ), the predominant pattern of interactions is revealed. **A)** For exteroceptive inferences (i.e., the agent’s belief that a spider or flower is present), the principle entropy gradient is characterized by reductions in exteroceptive precision. This effect is modulated in part by interoceptive precision; for example, the lowest uncertainty is obtained when interoceptive and exteroceptive precision are maximal. **B)** Separating exteroceptive uncertainty by each phase of the cardiac cycle reveals a clear effect of the heartbeat on belief entropy, which is modulated most strongly by lesioning the precision of exteroceptive predictions. Lesioning interoceptive uncertainty does raise the overall level of exteroceptive uncertainty, but to a lesser degree. Note that altering exteroceptive precision only affects the diastolic phases (as precision is already attenuated during systole). Interoceptive lesions preclude precise inferences about the cardiac phase, so reduce the discrepancy in uncertainty between these phases. **C)** Similar to exteroceptive belief, interoceptive metacognition is predominately influenced by interoceptive precision. **D)** The cardiac cycle also modulates the overall

348 uncertainty of interoceptive beliefs; this effect is greatly increased when interoceptive precision is lesioned.  
349 Interestingly, exteroceptive lesions primarily reduce the differentiation between cardiac states.

350

351 Finally, to complement these simulations we modelled the response of first and second order  
352 statistics of the physiological responses to changes in sensory precision. These were based  
353 upon simulated heart rate (frequency of systole) and the heart rate variability (HRV)  
354 assessed over multiple trials or heartbeats (Fig. 5). Our objectives here were; 1) to test the  
355 hypothesis that fluctuations in both low-and high- frequency synthetic heart rate variability  
356 can be produced by altering the balance of interoceptive sensory precision versus the prior  
357 precision for the aroused sympathetic policy, and 2) to illustrate how generative modelling  
358 of interoceptive active inference can be used to phenotype maladaptive inference  
359 parameters from observed heart-rate data (i.e., interoceptive inference phenotyping). For  
360 this analysis, we simulated 1000 trials under three canonical parameter settings designed to  
361 resemble potential neuropsychiatric phenotypes of interest: healthy interoception ( $\alpha = 0.8$ ,  
362  $\beta = 0.8$ , prior probability of parasympathetic policy = 55%), hyper-precise interoceptive  
363 sensation ( $\alpha = 0.8$ ,  $\beta = 1$ , prior probability of parasympathetic policy = 55%), and hyper-  
364 precise arousal priors ( $\alpha = 0.8$ ,  $\beta = 0.8$ , prior probability of sympathetic policy = 75%).

365         The resulting time-series of systole events from each agent were then convolved with  
366 a canonical QRS-wave response function and transformed into normalized beat-to-beat RR-  
367 intervals. To normalize the (arbitrary) sampling rate of each time-series, we assigned a  
368 350ms repetition time (TR) for each state of the MDP simulation, such that the healthy agent  
369 had a heart rate of approximately 60 BPM. The time intervals between successive synthetic  
370 R-peaks was then calculated. As the RR interval data is unevenly sampled, the time series  
371 was linearly interpolated. The power spectrum was then estimated using Welch's method.  
372 In line with conventional HRV analysis, the power spectra were then categorized into four  
373 frequency bands corresponding to ultra-low (0 - 0.04 Hz), low (0.04- 0.15 Hz), high (0.15 -  
374 0.4 Hz), and very-high (> 0.4 Hz) frequency categories. Finally, to summarize the  
375 physiological response of each agent, we calculated the beats per minute (BPM) and the ratio  
376 between low and high frequency components (LF/HF), i.e., sympathovagal gain or balance.  
377 Sympathovagal valance is thought to index the balance of sympathetic and vagal outflows  
378 and is frequently interpreted implicated in stress and other psychophysiological and clinical

379 disorders (Malliani et al., 1991; Strigo and Craig, 2016) but see (Eckberg Dwain L., 1997;  
 380 Heathers, 2012) for critique. Sympathovagal balance was calculated as the ratio of area  
 381 under the curve (AUC) for low and high-frequency HRV;  $AUC^{LF} / AUC^{HF}$ .  
 382

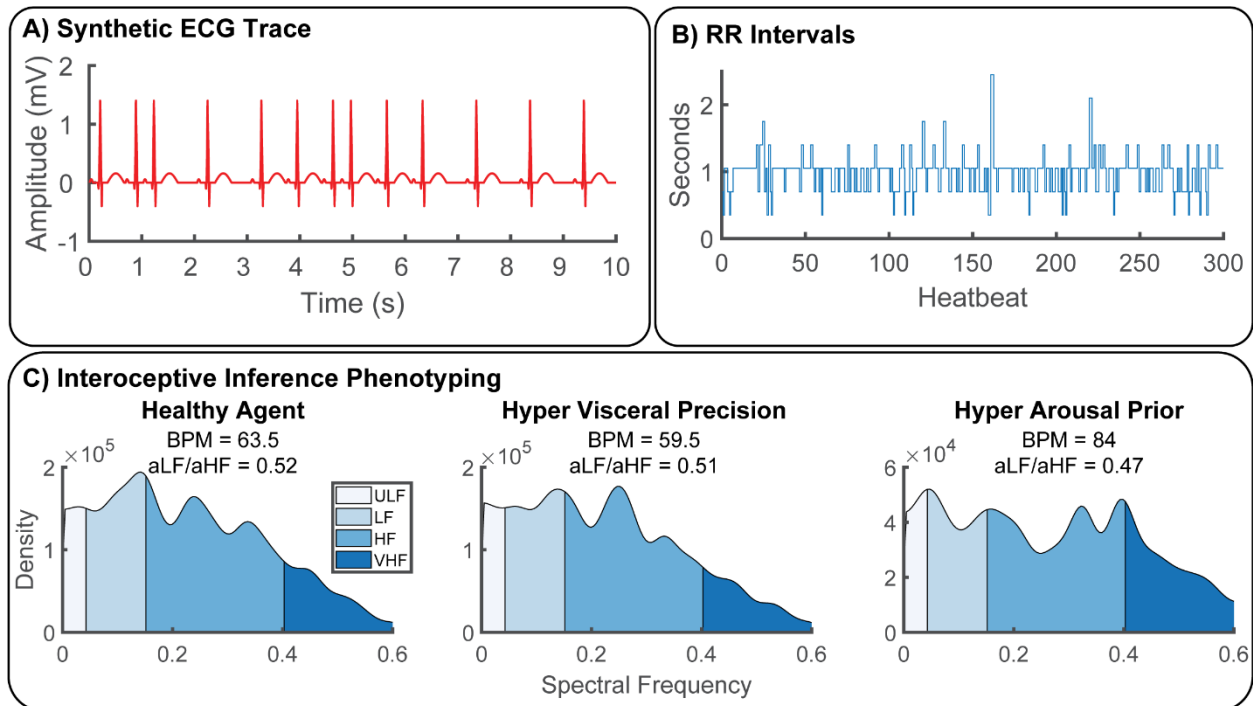

383  
 384 **Figure 5.** Synthetic Heart-Rate Variability (HRV) and Interoceptive Computational Phenotyping. To  
 385 illustrate the potential of our approach as a generative model of physiological reactivity, we produced synthetic  
 386 heartbeat traces and analyzed these with a standard time-frequency approach under various canonical  
 387 parameter settings. **A)** Synthetic ECG traces produced by convolving a standard QRS-wave function with systole  
 388 events generated by our model. **B)** These were then transformed into RR-intervals by assuming an 350ms  
 389 sampling rate, **C)** Power spectra of RR-intervals were calculated using Welch's method and categorized as ultra-  
 390 low (ULF), low (LF), high (HF), and very high frequency (VHF) bands for each simulated agent. Physiological  
 391 responses were then summarized in terms of beats-per-minute (BPM) and sympathovagal balance (ratio of  
 392 area under curve for each frequency band,  $aLF/aHF$ ) (Malliani et al., 1991). To illustrate the potential of our  
 393 approach for interoceptive computational phenotyping, we simulated three different agents – one with healthy  
 394 interoceptive inference (bottom left), another with hyper-precise visceral sensations (bottom middle), and  
 395 another with hyper-precise priors for the aroused (sympathetic) policy (bottom right). These each produce  
 396 unique interoceptive inference 'fingerprints'; i.e., the individual patterns of heart-rate variability produced by  
 397 these parameter settings. In this example, hyper-precise visceral sensations reduce heart-rate and shift overall  
 398 peak frequency to the high-frequency domain, whereas hyper strong arousal priors induce strong heart-rate



399 acceleration coupled with attenuated ultra-low and ultra-fast oscillations. In the future, these idiosyncratic  
400 patterns could be used to identify maladaptive interoceptive inference from heart-rate data.

401

402

## 403 **Results**

404

### 405 *Simulated Physiology and Perceptual Active Inference.*

406 To establish the face validity of our model, we simulated the basic psychophysiological  
407 behavior of our active inference agent. This involved simulating a fixed series of stimuli  
408 (states) in which the heartbeat was forced to remain relaxed – and only non-arousing  
409 (flower) stimuli were presented. On the 15th trial, an unexpected spider stimulus was  
410 presented, and the simulation continued for a further 85 trials. Thus, by evaluating the  
411 evolution of the agent’s synthetic interoceptive physiology and exteroceptive beliefs, before  
412 and after the quiescent baseline period, we hoped to reproduce and illuminate well-known  
413 psychophysiological phenomenon such as the defensive startle reflex (Graham and Clifton,  
414 1966; Sokolov, 1963).

415 This analysis, illustrated in Figure 3, revealed several interesting aspects of  
416 interoceptive active inference. Over 60 simulations there was a clear and robust increase in  
417 heart-rate acceleration, following the presentation of the unexpected or novel threat  
418 stimulus. During subsequent experiences of its own heartbeat and spiders or flowers, this  
419 response habituates, resulting in a gradual heart-rate deceleration from the evoked cardiac  
420 response. This robust modulation of heart-rate was accompanied by a jump from an  
421 expected probability of encountering a spider of about 25% to almost 65% following the  
422 spider presentation. This combined response of both the heartbeat and fear-expectations is  
423 further underscored by the curious oscillation of cardiac states and the expected probability  
424 of observing a spider; note the uptick in expectations of approximately 5% on each systole  
425 event (denoted by the pink dotted line on Figure 3, right panel). A simple explanation for  
426 this result is that, during presentation of a stream of flowers, we can confidently infer a safe  
427 external environment. This accounts for the relatively low probability of spiders in the  
428 earlier part of the plot. However, during systole, attenuated integration of exteroceptive data

429 leads to greater uncertainty. Going from a confident inference in the absence of a spider to a  
430 more uncertain inference necessarily increases the probability of a scary environment  
431 during this cardiac phase. This offers a simple perspective on previous experimental work  
432 suggesting that fear-stimuli are potentiated when presented in synchrony with the heart  
433 (Garfinkel et al., 2014; Garfinkel and Critchley, 2016); namely, that a mechanism underlying  
434 this effect can be found in the link between cardiac active inference and fear expectations. In  
435 short, under generative models of an embodied world – in which sensory sampling depends  
436 upon fast fluctuations in bodily states – there is a necessary dependency of Bayesian belief  
437 updating (i.e., perceptual inference) across all modalities on interoception.

438         When comparing these effects in the healthy agent to our sample of ‘lesion patients’,  
439 a few sensible but counter-intuitive consequences ensue. In the physiological domain, when  
440 presented with the unexpected arousal stimulus, the lesioned agent shows a blunted cardiac  
441 acceleration response, which remains diminished throughout the simulated trials. This  
442 blunting effect is mirrored for fear expectations in the immediate post-stimulus (e.g., trials  
443 15-20) period, further underlining the close link between visceral and exteroceptive  
444 inference in our agent. The reason for this blunting likely results from the differing  
445 exteroceptive precision anticipated during different cardiac phases (see also Fig. 4B). A  
446 visual impression – consistent with a spider – is highly informative during diastole but must  
447 be treated with suspicion during the sensory-attenuated systolic phase. This implies a  
448 blunting of belief-updating in response to a spider, when we are unsure of cardiac phase  
449 (compared to when we are confident of a diastolic phase). A further interesting result is  
450 found when examining the controlled baseline period (trials 0-15); baseline fear  
451 expectations in the interoceptive lesion group are actually slightly enhanced by about 5-10%  
452 posterior probability. This lends an interesting embodied twist to the literature on ‘circular  
453 inference’, psychosis and hallucinations (Denève and Jardri, 2016; Powers et al., 2017),  
454 suggesting that the disruption of interoceptive precision may be one mechanism underlying  
455 hallucinations, particularly those that are affective and/or somatic in nature.

456 *Simulating the Influence of Sensory Precision on Metacognition*

457 We next performed a series of simulations to tease apart how interoceptive and  
458 exteroceptive precision (and their disruption) influence ‘metacognition’; that is the  
459 uncertainty in our agent’s beliefs. To do so, we first measured the Shannon entropy for  
460 interoceptive and exteroceptive inferences (summed across both factors of posterior beliefs)  
461 under a full range of precision settings from 0.5 - 1. To highlight the oscillatory nature of  
462 cardiac effects, we then calculated the same entropy measure separately for each cardiac  
463 state (early diastole, late diastole, systole). Finally, we compared these ‘healthy’ simulations  
464 to extreme degradations in sensory precision (exteroceptive and interoceptive ‘lesions’), to  
465 better understand how disruptions of each modality are integrated in metacognition.

466 This analysis revealed first of all that, in our simplified model, metacognitive  
467 uncertainty is largely influenced by the unimodal precision of each domain. For both  
468 exteroceptive and interoceptive inferences, the slope of the uncertainty gradient (Fig. 4A &  
469 C) was predominantly characterized by degradations in the precision of the corresponding  
470 modality. However, this modularity is not complete; exteroceptive uncertainty is at its lowest  
471 when interoceptive and exteroceptive precision are maximal. Similarly, although  
472 interoceptive uncertainty is largely driven by interoceptive precision, small interactions  
473 with exteroceptive precision can be observed in the plotted uncertainty gradient. One  
474 interesting isomorphism, however, is that overall interoceptive uncertainty is less affected  
475 by exteroceptive precision. This is likely due to that fact that in our model, the cardiac cycle  
476 directly modulates exteroceptive precision, whereas exteroceptive states only indirectly  
477 modulate interoceptive responses, via policy selection.

478 This intricate relationship of the cardiac cycle and metacognitive uncertainty is  
479 further teased apart in Figure 4B, which shows clearly that exteroceptive confidence  
480 oscillates with each phase of the heartbeat, being highest at diastole. This is an unsurprising  
481 feature of our model: on each diastole, phase exteroceptive sensory precision drops  
482 effectively to null. Interestingly however, average exteroceptive uncertainty is modulated in  
483 a fairly linear fashion by visceral and exteroceptive lesions: average entropy is increased  
484 modestly by lesioning interoceptive precision and more robustly by exteroceptive lesions.  
485 Whereas interoceptive lesions caused the greatest increase in interoceptive entropy,

486 exteroceptive lesions seem to exert a specific effect of unbinding entropy from the individual  
487 cardiac state, again mirroring the isomorphic representation of these states in uncertainty.  
488 This is a sensible finding, as the manipulation leads to relatively high uncertainty in the  
489 mapping between hidden states and outcomes during all cardiac phases, not just during the  
490 previously attenuated systolic phase. This sort of chronic hypo-arousal – as a consequence  
491 of a failure to contextually modulate precision – is not unlike that which may underwrite the  
492 negative symptoms of schizophrenia or depression.

493 *Synthetic Heart-Rate Variability (HRV) and Embodied Computational Phenotyping*

494 In our final set of simulations, we illustrated how the interoceptive inference approach  
495 developed here offers a new means for analyzing and interpreting fluctuations in observed  
496 physiological data. Our goal here was to demonstrate the potential for generative modelling  
497 and ‘embodied computational phenotyping’; i.e., the identification of specific parameters of  
498 brain-body interaction underlying maladaptive interoceptive inference in psychiatric and  
499 other health-harming disorders; e.g., (Peters et al., 2017).

500 To this end, we generated synthetic cardiac data by convolving our train of cardiac  
501 events with an ECG response waveform. Following standard methods, we then calculated the  
502 normalized beat-to-beat intervals and performed a time-frequency analysis of the resulting  
503 RR-interval data. By repeating this analysis for a ‘healthy’ agent under normative values, an  
504 agent with interoceptive ‘hyper-precision’ (i.e.,  $\beta = 1$ ), and an agent with an overly precise  
505 prior beliefs about its own arousal, we illustrate how individual HRV fingerprints are linked  
506 to unique patterns of interoceptive active inference.

507 This analysis showed that, despite the exceedingly simple (biomechanically speaking)  
508 conditions of our model, sensible and interesting patterns of heart-rate variability emerge  
509 for different combinations of interoceptive sensory and prior precision. Specifically, we  
510 found that whereas the healthy agent exhibited a relatively relaxed profile in terms of heart  
511 rate and sympathovagal balance (BPM = 63.5, peak frequency = 0.14 Hz) – predominated by  
512 low versus high frequency oscillations (aLF/aHF = 0.52) – an agent with hyper-precise  
513 visceral sensations exhibited a mild downshift in heart-rate coupled (BPM= 59.5) with an  
514 overall increase in high-frequency oscillations (aLF/aHF = 0.51, peak frequency = 0.25). In

515 contrast, the agent with hyper-precise arousal priors showed a strong bimodal modulation  
516 of both ultra-low and ultra-high frequencies HRV (peak frequencies = 0.04 Hz & 0.34 Hz,  
517 respectively), coupled with a strong increase in heart-rate (BPM = 84) and high versus low-  
518 frequency outflow ( $a_{LF}/a_{HF} = 0.47$ ). These results speak to the unique role of different  
519 active inference parameters in producing highly idiosyncratic patterns of HRV variability. In  
520 the future, our model may be enhanced to subserve computational phenotyping of individual  
521 differences and/or patient subgroups categorized by the balance of visceral precision and  
522 arousal policy priors from raw HRV data alone.

523

524

## 525 **Discussion and Conclusions**

526

527 In the present work, we have introduced the first formal model of interoceptive inference as  
528 applied to emotion, exteroceptive perception, and metacognitive uncertainty. Through a  
529 variety of simulations, we demonstrated that this model can reproduce a variety of  
530 psychological and physiological phenomena, each of which speak to a unique domain of the  
531 burgeoning interoceptive inference literature (Allen and Friston, 2018; Feldman and Friston,  
532 2010; Seth, 2013), and the application of interoceptive inference to computational  
533 psychiatry (Owens et al., 2018; Petzschner et al., 2017). This formulation of interoceptive  
534 inference reproduces some of the finer details of physiological responses to arousing stimuli  
535 that, crucially, are emergent properties under the simple assumption that people use  
536 generative models to infer the state of their lived world.

537         The form of the generative model and (neurobiological implausible) belief updating  
538 used in this paper are generic: exactly the same scheme has been used to simulate a whole  
539 range of processes, from neuroeconomic games to scene construction and attentional neglect  
540 (Friston et al., 2017a; Parr and Friston, 2018). The key aspect of the generative model  
541 introduced here is that the quality (i.e., precision) of sensory information depends upon  
542 fluctuations in (inferred) autonomic states. This simple fact underwrites all of the  
543 phenomenology illustrated above; both in terms of simulated physiology and accompanying  
544 belief updates. The explicit inclusion of interoception into active inference licenses us to talk  
545 about ‘fear’ and in the sense that affective inference is thought to emerge under models that

546 generate multimodal predictions that encompass the interoceptive domain. Furthermore,  
547 casting everything as inference enables a metacognitive stance on belief updating, in the  
548 sense that one can quantify uncertainty invested in beliefs about states of the body, states of  
549 the world and, indeed, states of (autonomic) action.

550 In particular, we show that by simulating periodic attenuation of exteroceptive  
551 sensory inputs by the cardiac cycle, affective expectations become intrinsically linked to  
552 afferent interoceptive signals through a startle reflex-like phenomenon. This linkage not only  
553 induces oscillatory synchrony between the heartbeat and exteroceptive behavior, but also  
554 propagates to metacognitive uncertainty (i.e., the entropy of posterior beliefs). This latter  
555 finding speaks to numerous reports of metacognitive bias (e.g., confidence-accuracy  
556 dissociation) by illustrating how the precision of interoceptive states can directly influence  
557 exteroceptive uncertainty (Allen et al., 2016b; Boldt et al., 2017; Spence et al., 2016). By  
558 simulating synthetic heart-rate variability (HRV) responses, we further illustrated how  
559 idiosyncratic patterns of aberrant interoceptive precision-weighting can be recovered  
560 through generative modelling of physiological responses, opening the door to computational  
561 phenotyping of disordered brain-body interaction in the spirit of (Schwartenbeck P and K  
562 Friston 2016). In what follows, we outline some of what we view as the most promising  
563 future directions for this work, sketch a proposed neuroanatomy underlying our model, and  
564 point out a few limitations for consideration.

565 By focusing on the periodic nature of the cardiac cycle, and concomitant influences  
566 on exteroceptive perception, our goal was to provide an initial proof-of-principle, illustrating  
567 how visceral and exteroceptive signals may be combined under active inference. Our aim  
568 was not to suggest that our model provides the ultimate view of interoceptive inference;  
569 indeed, we view the present work as a starting point that can be taken forward in a variety  
570 of research directions, some of which are outline below.

571 In this paper, we formalized the hypothesis that frequently reported effects of cardiac  
572 timing on perception could arise as a function of periodic sensory attenuation – but the  
573 reader should feel encouraged to test their own hypotheses within the openly available MDP  
574 framework. Our intention here was also not to prioritize cardiac-brain interaction over e.g.,  
575 gastric or respiratory cycles, but instead to provide a toy example, to show how these  
576 systems may be subjected to formal analyses. This was motivated by the large predominance

577 of research on cardiac-brain interaction; however, we do anticipate that the periodic  
578 attenuation of sensory precision by visceral signals is likely to provide a general explanation  
579 of brain-body interaction.

580         Neurophysiologically, the principal means by which cardiac signals influence the  
581 central nervous system is through the afferent cardiac baroreceptors. These pressure-  
582 sensitive neurons, located primarily in the aorta and carotid artery, are triggered by the  
583 systolic pressure wave generated when the heart contracts. Far from being restricted to  
584 homeostatic function only, it was first reported (nearly a century ago) that afferent  
585 baroreceptor outputs induce a general inhibitory effect on cortical processing (Bonvallet et  
586 al., 1954; Bonvallet and Bloch, 1961; Koch, 1932). These findings were later extended by  
587 Lacey and Lacey (1978) who proposed the “neurovisceral afferent integration hypothesis”,  
588 positing that cardiac acceleration and deceleration serve to respectively disengage or engage  
589 with an exteroceptive stimulus via cortical inhibition.

590         In parallel, the soviet psychologist Evgeny Sokolov proposed that novelty (but not  
591 threat) evoked heart-rate deceleration was a core component of the ‘orienting reflex’  
592 (Sokolov, 1963). By reducing overall cardiac output, this reflex served to limit the  
593 contribution of cardiac signals to cortical noise boosting overall signal-to-noise ratio<sup>3</sup>. In  
594 contrast, Sokolov theorized that the defensive startle reflex – in which an extremely strong  
595 (e.g., the loud bang of a starting gun) or unexpectedly aversive (e.g., the sudden presentation  
596 of a spider) stimulus evokes cardiac acceleration – facilitated the disengagement of cortical  
597 processing, to initiate fight-or-flight responses. These theories in turn sparked a wave of  
598 empirical studies attempting to link cardio-acceleration and deceleration responses to  
599 increased or decreased exteroceptive sensitivity, which continues to this day (Azevedo et al.,  
600 2017; Cohen et al., 1980; Delfini and Campos, 1972; Edwards et al., 2009; Elliott, 1972;  
601 Garfinkel et al., 2014; Ghione, 1996; Park et al., 2014; Salomon et al., 2016; Sandman et al.,  
602 1977; Saxon, 1970; Velden and Juris, 1975).

---

<sup>3</sup> Sokolov (1963) described the orienting reflex as an ‘embodied’ mechanism for boosting to signal-to-noise and thus enhancing processing of the oddball stimulus. The reflex consists primarily of the rapid deployment of saccades to the oddball stimulus, freezing of the muscles of the head and neck so as to orient the visual organs towards the stimulus, and an immediate cardiac deceleration. In light of their inhibitory influence, the cardiac deceleration was thought to primarily reduce cortical noise; when coupled with the other bodily components of the response it was thought that effective overall signal would be maximized.

603           While these findings highlight the intricate relationship between cardiac timing and  
604 exteroceptive psychophysics, so far a consistent pattern of findings (e.g., sensory signal  
605 enhancement and/or inhibition) has failed to emerge (see Elliott, 1972 for one critique). A  
606 cursory review of this literature reveals evidence for both exteroceptive enhancement and  
607 suppression, depending upon the specific nature of the exteroceptive stimuli (i.e., whether  
608 they are inherently aversive, sociocultural, or neutral in nature), the context of the arousal  
609 (including specific stimulus and response timing), and other psychophysiological  
610 moderators; such as age, gender, and overall physical fitness. Accordingly, more recent  
611 proposals have focused on more modality-specific exteroceptive enhancement by cardiac  
612 signals. For example, that cardiac-exteroceptive effects specifically potentiate fear or threat  
613 signals (Garfinkel and Critchley, 2016) or the generation of a subjective first-person  
614 viewpoint (Park and Tallon-Baudry, 2014).

615           We offer a unique synthesis of these views, expressed in terms of interoceptive  
616 inference. In our model, the cyclic influence of the heart on exteroception is exerted primarily  
617 through the attenuation of sensory precision on each systolic contraction, which in turns  
618 influences the selected (multimodal) arousal policy as determined by the agent's  
619 preferences. The coupling of sensory attenuation to the cardiac cycle endorses the notion  
620 that baroreceptors exert an inhibitory influence on the brain. Beyond this direct effect, our  
621 model can also be understood in light of the well-known relationship between intrinsic noise  
622 fluctuations in the brain and cardio-respiratory cycles (Birn, 2012; Karavaev et al., 2018).  
623 Physiological oscillations exert non-neuronal influences on spontaneous brain activity via a  
624 variety of more or less direct causal influences; for example, at each heart beat visual input  
625 to the retina is briefly attenuated by a pulsatile blood inflow. Similarly, with each cardio-  
626 respiratory cycle, fluctuations in cerebral pulsatile motion and blood pressure induce  
627 neurons to spontaneously fire, shaping the 'infraslow' brain dynamics (Golanov et al., 1994;  
628 Karavaev et al., 2018; Zanatta et al., 2013) that influence the overall global dynamics of  
629 neural excitability and connectivity (Fox et al., 2007, 2006; Fox and Raichle, 2007). Our  
630 suggestion is that, insofar as the brain must model its own dynamic noise trajectories as a  
631 function of active self-inference, non-neuronal sources of variability such as inscribed by  
632 visceral rhythms must be incorporated within the brain's generative model of its own  
633 percepts. Interoceptive fluctuations are thus an important influence over the precision of



634 exteroceptive sensory channels, and interoception is itself the means by which the brain  
635 infers and controls its own pathway through these precision trajectories. The modelling  
636 introduced here can thus be expanded beyond the cardiac domain to the more general  
637 problem of modelling how spontaneous fluctuations in neurovisceral cycles (including  
638 heart-rate variability) influence information processing and behavior.

639         What then, explains the lack of consistent results within the cardiac timing literature?  
640 In contrast to the binary on/off hypotheses proposed by Lacey or Sokolov, our simulations  
641 highlight the context-sensitive manner by which ascending visceral signals modulate the  
642 precision of both interoceptive and exteroceptive inferences. For example, our simulation of  
643 the startle response (illustrated in Fig. 3) clearly indicates that the functional impact of  
644 cardio-ballistic responses is coupled to the agent's baseline prior expectations, as well as the  
645 overall precision of active inference and policy selection. In this sense, whether a specific  
646 cardiac response is likely to potentiate or inhibit a specific domain (e.g., fear) depends upon  
647 the specific weighting of arousal policy priors, the precision of incoming exteroceptive and  
648 interoceptive sensations, and the linkages thereof as determined by the task itself. In other  
649 words, the specific balance of prior beliefs and sensory information, in a given cognitive or  
650 affective domain, must be addressed before one can predict the exact directionality of an  
651 interoceptive effect on perception, or *vice versa*. Here, we modelled the generation of arousal  
652 policies as a function of hyper-parameters governing the preferred policy. In the future this  
653 can be unpacked further by examining the divergence between prior and posterior beliefs  
654 about these policies (e.g., through inferred epistemic value). Through Landauer's principle,  
655 this divergence may be equated with the associated metabolic costs of computation and the  
656 conceptual notion of interoceptive self-modelling (Kiverstein, 2018; Limanowski and  
657 Blankenburg, 2013; Seth and Tsakiris, 2018).

658

### 659 *The computational neuroanatomy of interoceptive inference*

660         Having addressed the construct validity of our model, we now speculate as to some  
661 likely neuronal substrates of the message passing implied by variational inference.  
662 Interoceptive inference can be broken down into four core functional domains: basic

663 sensory-motor control, conscious interoceptive (perceptual) awareness, metacognitive  
 664 monitoring, and hedonic (intrinsic) value. In our model, we focused primarily on the simplest  
 665 possible implementation of interoceptive inference, corresponding to the sensory-motor  
 666 domain (i.e., ascending and descending cardiac pathways) and their low-level interaction  
 667 with exteroceptive inference, via neuromodulatory gain control. Future work will benefit  
 668 from expanding upon our representation of uncertainty to include the computation of  
 669 epistemic and/or intrinsic value as proxies for these higher-order interoceptive systems  
 670 (Friston et al., 2017b; Parr and Friston, 2017).  
 671

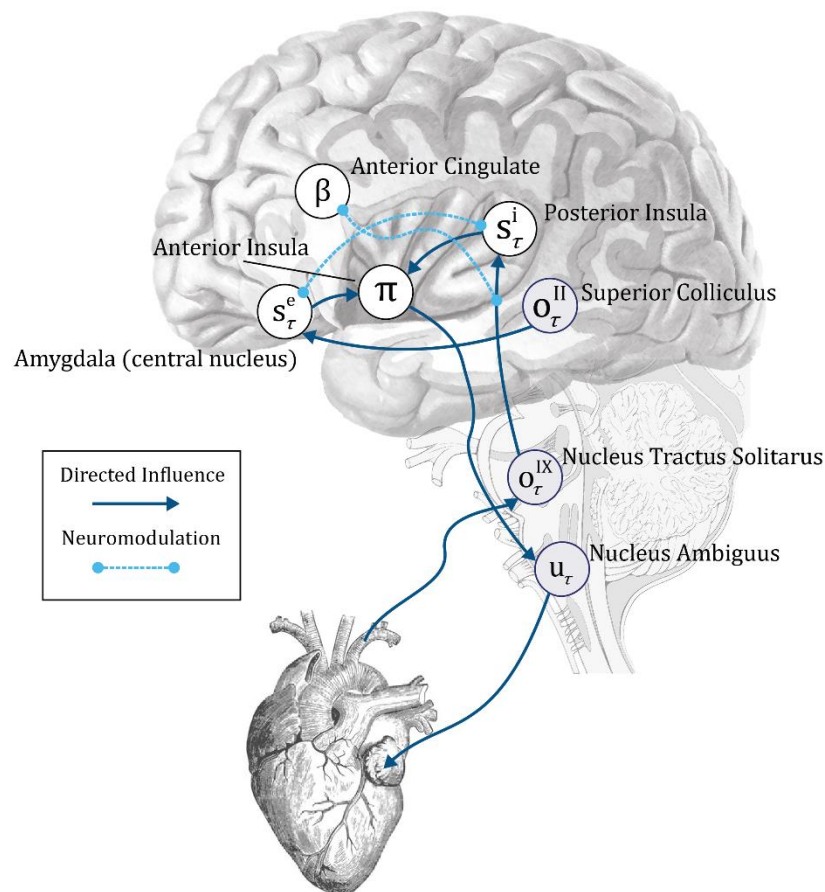

672  
 673 **Figure 6, computational neuroanatomy of interoception.** The schematic above shows the form of  
 674 the neuronal message passing implied by active inference for the generative model depicted in Figure 2. We  
 675 have related this to the anatomical networks that could implement these inferences. The sensory observations  
 676 in our simulations are visual and interoceptive (cardiac). These sensations are carried by cranial nerves II and  
 677 IX respectively. Cranial nerve II targets the superior colliculus in the midbrain. This structure sends short  
 678 latency visual data to the amygdala, which is well placed to make inferences about emotionally salient stimuli.

679 The amygdala additionally receives visual data from the ventral visual stream in the temporal lobe. Cranial  
680 nerve IX carries information from the carotid sinus baroreceptors to the nucleus tractus solitarius in the  
681 brainstem. This nucleus communicates with the posterior insula (via thalamic and PAG relays); the anterior  
682 cingulate monitors and controls the precision of this ascending visceral information via neuromodulation,  
683 possibly via feedback through noradrenergic pathways (not shown). The posterior insula and amygdala  
684 interact with one another but also project to the anterior insula. This targets the nucleus ambiguus (via  
685 brainstem relays such as the periaqueductal gray), which gives rise to the vagus (X) nerve. The vagus nerve  
686 targets neurons in the cardiac plexus that project to both the sinoatrial node and the atrioventricular node of  
687 the heart, slowing its rhythm. The nucleus tractus solitarius additionally participates in a reflex loop implicating  
688 the sympathetic control of the cardiac cycle, but this is omitted for simplicity. The functional anatomy suggested  
689 here implies the anterior insula might play a similar computational role in autonomic policy selection to the  
690 basal ganglia in selection of policies involving the skeletal muscles (Friston et al., 2018). Note that inscribed  
691 directed influences (blue arrows), are not assumed to be monosynaptic – for simplicity, many intermediary  
692 relay nodes have been omitted.

693

694         Accordingly, in our sketch of the putative neuroanatomy underlying cardiac active  
695 inference (Fig. 6), we focus primarily on the neuronal substrates that inscribe low-level  
696 viscerosensory and visceromotor control, as well as some hierarchically superior regions  
697 related to emotional salience and interoceptive awareness. For simplicity, our model depicts  
698 only the minimal neuronal message passing scheme implied by our generative model; as  
699 such, we have omitted many of the intermediary relay nodes; e.g., in the thalamus and ventral  
700 visual stream. Afferent baroreceptor signals are transmitted along the ascending vagus to  
701 the rostrum of the nucleus tractus solitarius (NTS, Mifflin and Felder, 1990; Miura and Reis,  
702 1972). From here, ascending viscerosensory signal are projected via brainstem and midbrain  
703 nuclei to the thalamus, somatosensory cortex, and posterior insula (Cechetto and Saper,  
704 1987; Craig, 2002); ascending cardio-sensory outcomes are thus encoded in the NTS and  
705 then passed to the posterior insular cortex (PIC) as inferred interoceptive states. The PIC has  
706 a well-known role as primary viscerosensory cortex; electrical stimulation of this area elicits  
707 phantom visceral sensations (e.g., pain, heart-rate acceleration) (Chouchou et al., 2019;  
708 Oppenheimer et al., 1992) and bolus isoproterenol infusions increase the intensity of  
709 cardiorespiratory sensations and concomitant PIC activations (Hassanpour et al., 2016;  
710 Khalsa et al., 2009). In parallel, visual sensory outcomes are passed via the second cranial  
711 nerve to the superior colliculus, where they inform exteroceptive inference in the amygdala,

712 which is well-situated to process salient emotional stimuli (Anderson and Phelps, 2001;  
713 Liddell et al., 2005). These interoceptive and exteroceptive expectations then converge in the  
714 anterior insular cortex (AIC), where they inform the selection of the appropriate autonomic  
715 policy. Finally, the selected policy is passed down the hierarchy via descending pathways  
716 (likely carried by von Economo neurons), to eventually engage the rostral nucleus ambiguus  
717 and descending vagus, decelerating the heart-rate when the relaxed policy is selected.  
718 Collectively, the scheme represents a multimodal reflex arc interlinking exteroceptive and  
719 interoceptive domains to specific patterns of cardio-ballistic responses.

720         Within this scheme, we suggest that the rostral anterior cingulate (ACC) controls the  
721 precision of ascending visceral outcomes and inferred interoceptive states via  
722 neuromodulatory gain control (Fardo et al., 2017; Feldman and Friston, 2010). Further,  
723 interoceptive and exteroceptive state precisions (in our scheme) interact indirectly through  
724 global neuromodulatory influences, possibly through regulation of noradrenaline by the ACC  
725 (via descending influence on the locus coeruleus). Neurobiologically and functionally  
726 speaking, the AIC and ACC share similar profiles; both are densely populated with Von  
727 Economo neurons (VENs), which are well-suited for the long-range modulation of neural  
728 activity across the cortex (Allman et al., 2011), and also contain diverse populations of  
729 noradrenergic, dopaminergic, and opioidergic neurons. Both regions further share an  
730 integrative connectivity structure, with projections to both lower-level visceral-motor  
731 brainstem nuclei and higher-order regions implicated in decision-making, metacognition,  
732 and self-awareness, such as the ventromedial and dorsomedial prefrontal cortices (Allen et  
733 al., 2017, 2016a; Fleming and Dolan, 2012; Menon and Uddin, 2010; Ullsperger et al., 2010).  
734 However, the AIC is more densely interconnected with the PIC whereas the ACC is more  
735 closely related to uncertainty and decision-making. On this basis, we propose that whereas  
736 the AIC integrates the visceral and exteroceptive states required for the regulation of arousal  
737 policies, the ACC is likely to regulate the gain or precision of these interactions<sup>4</sup>.

---

<sup>4</sup> It is worth noting that this model may explain the widespread, seemingly unspecific activation profiles of these areas (Chang et al., 2013; Yarkoni et al., 2011), as the generative model specified here suggests both form part of an integrated hierarchical circuit by which interoceptive and exteroceptive states interact: e.g., either through the regulation of arousal policies or through the modulation of ascending viscerosensory precision.

738           What about metacognitive or reward-related interoceptive processes? Although here  
739 we do not model these higher-order functions, the model can be expanded to include the  
740 explicit representation of policy uncertainty and epistemic value as the mechanisms  
741 underlying metacognitive self-inference; i.e., the integrative self-model that combines  
742 exteroceptive and interoceptive predictions into a conscious schema (Allen and Tsakiris,  
743 2019). In this case, we would expect that the VMPFC and DLPFC are likely to be engaged in  
744 inferences about variables (e.g., those derived from expected free energy such as epistemic  
745 and intrinsic value) that contextualize the inferences performed by the AIC and ACC over  
746 longer timescales (Friston et al., 2015, 2017a).

747

#### 748 *Limitations and Future Directions*

749 The model and simulations presented here represent a minimal proof-of-principle  
750 demonstrating how cyclic interactions of interoceptive and exteroceptive perception arise  
751 directly from the principles of active inference. Here, our primary goal was to move the  
752 literature beyond purely conceptual analyses of ‘interoceptive inference’, to provide a formal  
753 model sub-serving direct hypothesis testing. As such, we focus primarily on reproducing  
754 commonly reported phenomena, rather than empirical cross-validation or biological  
755 plausibility. While the model presented here does a reasonably good job of approximating  
756 the cardiac cycle, it should be clear that much work remains to be done if the model is to be  
757 used as a full generative model; e.g., of heart-brain interactions and/or physiological data  
758 such as HRV. We therefore anticipate a variety of fruitful applications. For example, the  
759 present MDP scheme could be expanded to include biologically realistic cardiac parameters,  
760 or to include other visceral modalities such as gastric or respiratory fluctuations. Similarly,  
761 the exteroceptive states modelled here could be adapted to a variety of experimental tasks  
762 to capture embodied influences on, for example, active spatial navigation (Kaplan and  
763 Friston, 2018; Lockmann et al., 2018; Lockmann and Tort, 2018), active reward learning  
764 (FitzGerald et al., 2015; Marshall et al., 2019), interaction between the cardiac cycle and  
765 ballistic saccades (Galvez-Pol et al., 2018; Mirza et al., 2016; Ohl et al., 2016), or  
766 metacognitive self-inference (Allen et al., 2016b; Friston et al., 2017b; Hauser et al., 2017a).

767 These and other future directions will hopefully guide a newly embodied approach to  
768 computational psychiatry, enabling the detailed phenotyping of clinical populations in terms  
769 of aberrant interoceptive inference.

770

771

772

773 **Acknowledgements**

774

775 MA is supported by a Lundbeckfonden Fellowship (R272-2017-4345), the AIAS-COFUND II  
776 fellowship programme that is supported by the Marie Skłodowska-Curie actions under the  
777 European Union’s Horizon 2020 (Grant agreement no 754513), and the Aarhus University  
778 Research Foundation. TP is supported by the Rosetrees Trust (Award Number 173346) TP.  
779 KJF is a Wellcome Principal Research Fellow (Ref: 088130/Z/09/Z). The authors further  
780 thank Maxwell Ramstead, Casper Hesp, and Francesca Fardo for fruitful discussions and  
781 inputs on the manuscript and modelling therein.

782

783

784 **Data and Code Availability**

785 The underlying MDP scheme here is available as part of the open-access distribution of  
786 SPM12. A demonstration of the scheme can be accessed by typing >>DEM into the Matlab  
787 command prompt and selecting the **Interoception** demo from the graphical user interface  
788 that appears. Further, all the code required to generate the simulations and figures herein  
789 can be found at the following github page: [https://github.com/embodied-computation-](https://github.com/embodied-computation-group/cardiac-active-inference)  
790 [group/cardiac-active-inference](https://github.com/embodied-computation-group/cardiac-active-inference).

791

792 **References**

- 793 Allen M, Fardo F, Dietz MJ, Hillebrandt H, Friston KJ, Rees G, Roepstorff A. 2016a. Anterior  
794 insula coordinates hierarchical processing of tactile mismatch responses.  
795 *NeuroImage* **127**:34–43. doi:10.1016/j.neuroimage.2015.11.030
- 796 Allen M, Frank D, Schwarzkopf DS, Fardo F, Winston JS, Hauser TU, Rees G. 2016b.  
797 Unexpected arousal modulates the influence of sensory noise on confidence. *eLife*  
798 **5**:e18103. doi:10.7554/eLife.18103
- 799 Allen M, Friston KJ. 2018. From cognitivism to autopoiesis: towards a computational  
800 framework for the embodied mind. *Synthese* **195**:2459–2482. doi:10.1007/s11229-  
801 016-1288-5
- 802 Allen M, Glen JC, Müllensiefen D, Schwarzkopf DS, Fardo F, Frank D, Callaghan MF, Rees G.  
803 2017. Metacognitive ability correlates with hippocampal and prefrontal  
804 microstructure. *NeuroImage* **149**:415–423. doi:10.1016/j.neuroimage.2017.02.008
- 805 Allen M, Tsakiris M. 2019. The body as first prior: Interoceptive predictive processing and  
806 the primacyThe Interoceptive Mind: From Homeostasis to Awareness. Great  
807 Clarendon Street, Oxford, OX2 6DP: Oxford University Press. pp. 27–45.
- 808 Allman JM, Tetreault NA, Hakeem AY, Manaye KF, Semendeferi K, Erwin JM, Park S, Goubert  
809 V, Hof PR. 2011. The von Economo neurons in the fronto-insular and anterior cingulate  
810 cortex. *Ann N Y Acad Sci* **1225**:59–71. doi:10.1111/j.1749-6632.2011.06011.x
- 811 Anderson AK, Phelps EA. 2001. Lesions of the human amygdala impair enhanced perception  
812 of emotionally salient events. *Nature* **411**:305–309. doi:10.1038/35077083
- 813 Apps MA, Tsakiris M. 2014. The free-energy self: a predictive coding account of self-  
814 recognition. *Neurosci Biobehav Rev* **41**:85–97.
- 815 Attias H. 2003. Planning by probabilistic inference. Proc. of the 9th Int. Workshop on Artificial  
816 Intelligence and Statistics. Presented at the AISTATS.
- 817 Azevedo RT, Garfinkel SN, Critchley HD, Tsakiris M. 2017. Cardiac afferent activity modulates  
818 the expression of racial stereotypes. *Nat Commun* **8**:13854.  
819 doi:10.1038/ncomms13854
- 820 Barto A, Mirolli M, Baldassarre G. 2013. Novelty or surprise? *Front Psychol* **4**:907.
- 821 Birn RM. 2012. The role of physiological noise in resting-state functional connectivity.  
822 *Neuroimage* **62**:864–870.
- 823 Boldt A, de Gardelle V, Yeung N. 2017. The impact of evidence reliability on sensitivity and  
824 bias in decision confidence. *J Exp Psychol Hum Percept Perform* **43**:1520–1531.  
825 doi:10.1037/xhp0000404
- 826 Bonvallet M, Bloch V. 1961. Bulbar control of cortical arousal. *Science* **133**:1133–1134.
- 827 Bonvallet M, Dell P, Hiebel G. 1954. Tonus sympathique et activité électrique corticale.  
828 *Electroencephalogr Clin Neurophysiol* **6**:119–144.
- 829 Botvinick M, Toussaint M. 2012. Planning as inference. *Trends Cogn Sci* **16**:485–488.  
830 doi:10.1016/j.tics.2012.08.006
- 831 Cechetto DF, Saper CB. 1987. Evidence for a viscerotopic sensory representation in the  
832 cortex and thalamus in the rat. *J Comp Neurol* **262**:27–45.  
833 doi:10.1002/cne.902620104
- 834 Chang LJ, Yarkoni T, Khaw MW, Sanfey AG. 2013. Decoding the Role of the Insula in Human  
835 Cognition: Functional Parcellation and Large-Scale Reverse Inference. *Cereb Cortex*  
836 **23**:739–749. doi:10.1093/cercor/bhs065



- 837 Chouchou F, Mauguière F, Vallayer O, Catenoix H, Isnard J, Montavont A, Jung J, Pichot V,  
838 Rheims S, Mazzola L. 2019. How the insula speaks to the heart: Cardiac responses to  
839 insular stimulation in humans. *Hum Brain Mapp*. doi:10.1002/hbm.24548
- 840 Cohen R, Lieb H, Rist F. 1980. Loudness judgments, evoked potentials, and reaction time to  
841 acoustic stimuli early and late in the cardiac cycle in chronic schizophrenics.  
842 *Psychiatry Res* **3**:23–29.
- 843 Craig AD. 2002. How do you feel? Interoception: the sense of the physiological condition of  
844 the body. *Nat Rev Neurosci* **3**:655–666. doi:10.1038/nrn894
- 845 Delfini LF, Campos JJ. 1972. Signal Detection and the “Cardiac Arousal Cycle.”  
846 *Psychophysiology* **9**:484–491. doi:10.1111/j.1469-8986.1972.tb01801.x
- 847 Denève S, Jardri R. 2016. Circular inference: mistaken belief, misplaced trust. *Curr Opin Behav*  
848 *Sci, Computational modeling* **11**:40–48. doi:10.1016/j.cobeha.2016.04.001
- 849 Eckberg Dwain L. 1997. Sympathovagal Balance. *Circulation* **96**:3224–3232.  
850 doi:10.1161/01.CIR.96.9.3224
- 851 Edwards L, Ring C, McIntyre D, Winer JB, Martin U. 2009. Sensory detection thresholds are  
852 modulated across the cardiac cycle: Evidence that cutaneous sensibility is greatest for  
853 systolic stimulation. *Psychophysiology* **46**:252–256. doi:10.1111/j.1469-  
854 8986.2008.00769.x
- 855 Elliott R. 1972. The significance of heart rate for behavior: A critique of Lacey’s hypothesis.
- 856 Fardo F, Aukstulewicz R, Allen M, Dietz MJ, Roepstorff A, Friston KJ. 2017. Expectation  
857 violation and attention to pain jointly modulate neural gain in somatosensory cortex.  
858 *NeuroImage* **153**:109–121. doi:10.1016/j.neuroimage.2017.03.041
- 859 Feldman H, Friston K. 2010. Attention, Uncertainty, and Free-Energy. *Front Hum Neurosci*  
860 **4**:215. doi:10.3389/fnhum.2010.00215
- 861 FitzGerald THB, Dolan RJ, Friston K. 2015. Dopamine, reward learning, and active inference.  
862 *Front Comput Neurosci* **9**:136. doi:10.3389/fncom.2015.00136
- 863 Fleming SM, Dolan RJ. 2012. The neural basis of metacognitive ability. *Philos Trans R Soc B*  
864 *Biol Sci* **367**:1338–1349. doi:10.1098/rstb.2011.0417
- 865 Fox MD, Raichle ME. 2007. Spontaneous fluctuations in brain activity observed with  
866 functional magnetic resonance imaging. *Nat Rev Neurosci* **8**:700.
- 867 Fox MD, Snyder AZ, Vincent JL, Raichle ME. 2007. Intrinsic fluctuations within cortical  
868 systems account for intertrial variability in human behavior. *Neuron* **56**:171–184.
- 869 Fox MD, Snyder AZ, Zacks JM, Raichle ME. 2006. Coherent spontaneous activity accounts for  
870 trial-to-trial variability in human evoked brain responses. *Nat Neurosci* **9**:23.
- 871 Friston K, Rigoli F, Ognibene D, Mathys C, Fitzgerald T, Pezzulo G. 2015. Active inference and  
872 epistemic value. *Cogn Neurosci* **6**:187–214.
- 873 Friston KJ, FitzGerald T, Rigoli F, Schwartenbeck P, Pezzulo G. 2017a. Active inference: a  
874 process theory. *Neural Comput* **29**:1–49.
- 875 Friston KJ, Lin M, Frith CD, Pezzulo G, Hobson JA, Ondobaka S. 2017b. Active Inference,  
876 Curiosity and Insight. *Neural Comput* **29**:2633–2683. doi:10.1162/neco\_a\_00999
- 877 Friston KJ, Parr T, de Vries B. 2017c. The graphical brain: Belief propagation and active  
878 inference. *Netw Neurosci* **1**:381–414. doi:10.1162/NETN\_a\_00018
- 879 Friston KJ, Rosch R, Parr T, Price C, Bowman H. 2018. Deep temporal models and active  
880 inference. *Neurosci Biobehav Rev* **90**:486–501. doi:10.1016/j.neubiorev.2018.04.004
- 881 Gallagher S, Allen M. 2018. Active inference, enactivism and the hermeneutics of social  
882 cognition. *Synthese* **195**:2627–2648. doi:10.1007/s11229-016-1269-8

- 883 Galvez-Pol A, McConnell R, Kilner J. 2018. Active sampling during visual search is modulated  
884 by the cardiac cycle. *bioRxiv* 405902.
- 885 Garfinkel SN, Critchley HD. 2016. Threat and the Body: How the Heart Supports Fear  
886 Processing. *Trends Cogn Sci* **20**:34–46. doi:10.1016/j.tics.2015.10.005
- 887 Garfinkel SN, Minati L, Gray MA, Seth AK, Dolan RJ, Critchley HD. 2014. Fear from the Heart:  
888 Sensitivity to Fear Stimuli Depends on Individual Heartbeats. *J Neurosci* **34**:6573–  
889 6582. doi:10.1523/JNEUROSCI.3507-13.2014
- 890 Ghione S. 1996. Hypertension-associated hypalgesia: Evidence in experimental animals and  
891 humans, pathophysiological mechanisms, and potential clinical consequences.  
892 *Hypertension* **28**:494–504.
- 893 Golanov EV, Yamamoto S, Reis DJ. 1994. Spontaneous waves of cerebral blood flow  
894 associated with a pattern of electrocortical activity. *Am J Physiol-Regul Integr Comp*  
895 *Physiol* **266**:R204–R214. doi:10.1152/ajpregu.1994.266.1.R204
- 896 Graham FK, Clifton RK. 1966. Heart-rate change as a component of the orienting response.  
897 *Psychol Bull* **65**:305–320. doi:10.1037/h0023258
- 898 Hassanpour MS, Yan L, Wang DJJ, Lapidus RC, Arevian AC, Simmons W. Kyle, Feusner Jamie  
899 D., Khalsa Sahib S. 2016. How the heart speaks to the brain: neural activity during  
900 cardiorespiratory interoceptive stimulation. *Philos Trans R Soc B Biol Sci*  
901 **371**:20160017. doi:10.1098/rstb.2016.0017
- 902 Hauser TU, Allen M, Purg N, Moutoussis M, Rees G, Dolan RJ. 2017a. Noradrenaline blockade  
903 specifically enhances metacognitive performance. *eLife* **6**. doi:10.7554/eLife.24901
- 904 Hauser TU, Allen M, Rees G, Dolan RJ. 2017b. Metacognitive impairments extend perceptual  
905 decision making weaknesses in compulsivity. *Sci Rep* **7**:6614. doi:10.1038/s41598-  
906 017-06116-z
- 907 Heathers JAJ. 2012. Sympathovagal balance from heart rate variability: an obituary. *Exp*  
908 *Physiol* **97**:556–556. doi:10.1113/expphysiol.2011.063867
- 909 Herrero JL, Khuvis S, Yeagle E, Cerf M, Mehta AD. 2017. Breathing above the brainstem:  
910 Volitional control and attentional modulation in humans. *J Neurophysiol*.
- 911 Itti L, Baldi P. 2009. Bayesian surprise attracts human attention. *Vision Res* **49**:1295–1306.
- 912 Kaplan R, Friston KJ. 2018. Planning and navigation as active inference. *Biol Cybern* **112**:323–  
913 343. doi:10.1007/s00422-018-0753-2
- 914 Karavaev AS, Kiselev AR, Runnova AE, Zhuravlev MO, Borovkova EI, Prokhorov MD,  
915 Ponomarenko VI, Pchelintseva SV, Efremova TY, Koronovskii AA, Hramov AE. 2018.  
916 Synchronization of infra-slow oscillations of brain potentials with respiration. *Chaos*  
917 *Interdiscip J Nonlinear Sci* **28**:081102. doi:10.1063/1.5046758
- 918 Khalsa SS, Rudrauf D, Sandesara C, Olshansky B, Tranel D. 2009. Bolus isoproterenol  
919 infusions provide a reliable method for assessing interoceptive awareness. *Int J*  
920 *Psychophysiol*, Central and peripheral nervous system interactions: From mind to  
921 brain to body **72**:34–45. doi:10.1016/j.ijpsycho.2008.08.010
- 922 Kiverstein J. 2018. Free Energy and the Self: An Ecological–Enactive Interpretation. *Topoi*.  
923 doi:10.1007/s11245-018-9561-5
- 924 Koch E. 1932. Die irradiation der pressoreceptorischen kreislaufreflexe. *J Mol Med* **11**:225–  
925 227.
- 926 Kunzendorf S, Klotzsche F, Akbal M, Villringer A, Ohl S, Gaebler M. 2019. Active information  
927 sampling varies across the cardiac cycle. *Psychophysiology* e13322.

- 928 Lacey BC, Lacey JJ. 1978. Two-way communication between the heart and the brain:  
929 Significance of time within the cardiac cycle. *Am Psychol* **33**:99.
- 930 Liddell BJ, Brown KJ, Kemp AH, Barton MJ, Das P, Peduto A, Gordon E, Williams LM. 2005. A  
931 direct brainstem–amygdala–cortical ‘alarm’ system for subliminal signals of fear.  
932 *NeuroImage* **24**:235–243. doi:10.1016/j.neuroimage.2004.08.016
- 933 Limanowski J, Blankenburg F. 2013. Minimal self-models and the free energy principle. *Front*  
934 *Hum Neurosci* **7**. doi:10.3389/fnhum.2013.00547
- 935 Lockmann ALV, Laplagne DA, Tort ABL. 2018. Olfactory bulb drives respiration-coupled beta  
936 oscillations in the rat hippocampus. *Eur J Neurosci* **48**:2663–2673.  
937 doi:10.1111/ejn.13665
- 938 Lockmann ALV, Tort ABL. 2018. Nasal respiration entrains delta-frequency oscillations in  
939 the prefrontal cortex and hippocampus of rodents. *Brain Struct Funct* **223**:1–3.  
940 doi:10.1007/s00429-017-1573-1
- 941 Malliani A, Pagani M, Lombardi F, Cerutti S. 1991. Cardiovascular neural regulation explored  
942 in the frequency domain. *Circulation* **84**:482–492. doi:10.1161/01.CIR.84.2.482
- 943 Marshall AC, Gentsch A, Blum A-L, Broering C, Schütz-Bosbach S. 2019. I feel what I do:  
944 Relating interoceptive processes and reward-related behavior. *NeuroImage*  
945 **191**:315–324. doi:10.1016/j.neuroimage.2019.02.032
- 946 Menon V, Uddin LQ. 2010. Saliency, switching, attention and control: a network model of  
947 insula function. *Brain Struct Funct* **214**:655–667. doi:10.1007/s00429-010-0262-0
- 948 Mifflin SW, Felder RB. 1990. Synaptic mechanisms regulating cardiovascular afferent inputs  
949 to solitary tract nucleus. *Am J Physiol-Heart Circ Physiol* **259**:H653–H661.  
950 doi:10.1152/ajpheart.1990.259.3.H653
- 951 Mirza MB, Adams RA, Mathys CD, Friston KJ. 2016. Scene Construction, Visual Foraging, and  
952 Active Inference. *Front Comput Neurosci* **10**:56. doi:10.3389/fncom.2016.00056
- 953 Miura M, Reis DJ. 1972. The role of the solitary and paramedian reticular nuclei in mediating  
954 cardiovascular reflex responses from carotid baro- and chemoreceptors. *J Physiol*  
955 **223**:525–548. doi:10.1113/jphysiol.1972.sp009861
- 956 Ohl S, Wohltat C, Kliegl R, Pollatos O, Engbert R. 2016. Microsaccades are coupled to  
957 heartbeat. *J Neurosci* **36**:1237–1241.
- 958 Oppenheimer SM, Gelb A, Girvin JP, Hachinski VC. 1992. Cardiovascular effects of human  
959 insular cortex stimulation. *Neurology* **42**:1727. doi:10.1212/WNL.42.9.1727
- 960 Oudeyer P-Y, Kaplan F. 2009. What is intrinsic motivation? A typology of computational  
961 approaches. *Front Neurobotics* **1**:6.
- 962 Owens AP, Allen M, Ondobaka S, Friston KJ. 2018. Interoceptive inference: From  
963 computational neuroscience to clinic. *Neurosci Biobehav Rev* **90**:174–183.  
964 doi:10.1016/j.neubiorev.2018.04.017
- 965 Park H-D, Correia S, Ducorps A, Tallon-Baudry C. 2014. Spontaneous fluctuations in neural  
966 responses to heartbeats predict visual detection. *Nat Neurosci* **17**:612–618.  
967 doi:10.1038/nn.3671
- 968 Park H-D, Tallon-Baudry C. 2014. The neural subjective frame: from bodily signals to  
969 perceptual consciousness. *Philos Trans R Soc B Biol Sci* **369**:20130208.
- 970 Parr T, Friston KJ. 2018. The Computational Anatomy of Visual Neglect. *Cereb Cortex* **28**:777–  
971 790. doi:10.1093/cercor/bhx316
- 972 Parr T, Friston KJ. 2017. Uncertainty, epistemics and active inference. *J R Soc Interface*  
973 **14**:20170376. doi:10.1098/rsif.2017.0376

- 974 Parr T, Markovic D, Kiebel SJ, Friston KJ. 2019. Neuronal message passing using Mean-field,  
 975 Bethe, and Marginal approximations. *Sci Rep* **9**:1889. doi:10.1038/s41598-018-  
 976 38246-3
- 977 Peters A, McEwen BS, Friston K. 2017. Uncertainty and stress: Why it causes diseases and  
 978 how it is mastered by the brain. *Prog Neurobiol* **156**:164–188.  
 979 doi:10.1016/j.pneurobio.2017.05.004
- 980 Petzschner FH, Weber LAE, Gard T, Stephan KE. 2017. Computational Psychosomatics and  
 981 Computational Psychiatry: Toward a Joint Framework for Differential Diagnosis. *Biol*  
 982 *Psychiatry, Computational Psychiatry* **82**:421–430.  
 983 doi:10.1016/j.biopsych.2017.05.012
- 984 Powers AR, Mathys C, Corlett PR. 2017. Pavlovian conditioning–induced hallucinations result  
 985 from overweighting of perceptual priors. *Science* **357**:596–600.  
 986 doi:10.1126/science.aan3458
- 987 Salomon R, Ronchi R, Dönz J, Bello-Ruiz J, Herbelin B, Martet R, Faivre N, Schaller K, Blanke  
 988 O. 2016. The Insula Mediates Access to Awareness of Visual Stimuli Presented  
 989 Synchronously to the Heartbeat. *J Neurosci* **36**:5115–5127.  
 990 doi:10.1523/JNEUROSCI.4262-15.2016
- 991 Sandman CA, McCanne TR, Kaiser DN, Diamond B. 1977. Heart rate and cardiac phase  
 992 influences on visual perception. *J Comp Physiol Psychol* **91**:189.
- 993 Saxon SA. 1970. Detection of near threshold signals during four phases of cardiac cycle. *Ala J*  
 994 *Med Sci* **7**:427.
- 995 Schmidhuber J. 2010. Formal theory of creativity, fun, and intrinsic motivation. *IEEE Trans*  
 996 *Auton Ment Dev* **2**:230–247.
- 997 Seth AK. 2013. Interoceptive inference, emotion, and the embodied self. *Trends Cogn Sci*  
 998 **17**:565–573. doi:10.1016/j.tics.2013.09.007
- 999 Seth AK, Friston KJ. 2016. Active interoceptive inference and the emotional brain. *Philos*  
 1000 *Trans R Soc B Biol Sci* **371**:20160007. doi:10.1098/rstb.2016.0007
- 1001 Seth AK, Tsakiris M. 2018. Being a Beast Machine: The Somatic Basis of Selfhood. *Trends Cogn*  
 1002 *Sci* **22**:969–981. doi:10.1016/j.tics.2018.08.008
- 1003 Sokolov EN. 1963. Higher nervous functions: The orienting reflex. *Annu Rev Physiol* **25**:545–  
 1004 580.
- 1005 Spence ML, Dux PE, Arnold DH. 2016. Computations underlying confidence in visual  
 1006 perception. *J Exp Psychol Hum Percept Perform* **42**:671–682.  
 1007 doi:10.1037/xhp0000179
- 1008 Strigo A, Craig AD. 2016. Interoception, homeostatic emotions and sympathovagal balance.  
 1009 *Philos Trans R Soc B Biol Sci* **371**:20160010. doi:10.1098/rstb.2016.0010
- 1010 Tort ABL, Brankač J, Draguhn A. 2018a. Respiration-Entrained Brain Rhythms Are Global  
 1011 but Often Overlooked. *Trends Neurosci* **41**:186–197. doi:10.1016/j.tins.2018.01.007
- 1012 Tort ABL, Ponsel S, Jessberger J, Yanovsky Y, Brankač J, Draguhn A. 2018b. Parallel detection  
 1013 of theta and respiration-coupled oscillations throughout the mouse brain. *Sci Rep*  
 1014 **8**:6432–6432. doi:10.1038/s41598-018-24629-z
- 1015 Ullsperger M, Harsay HA, Wessel JR, Ridderinkhof KR. 2010. Conscious perception of errors  
 1016 and its relation to the anterior insula. *Brain Struct Funct* **214**:629–643.  
 1017 doi:10.1007/s00429-010-0261-1

- 1018 Varga S, Heck DH. 2017. Rhythms of the body, rhythms of the brain: Respiration, neural  
1019 oscillations, and embodied cognition. *Conscious Cogn* **56**:77–90.  
1020 doi:10.1016/j.concog.2017.09.008
- 1021 Velden M, Juris M. 1975. Perceptual Performance as a Function of Intra-Cycle Cardiac  
1022 Activity. *Psychophysiology* **12**:685–692. doi:10.1111/j.1469-8986.1975.tb00075.x
- 1023 Yarkoni T, Poldrack RA, Nichols TE, Van Essen DC, Wager TD. 2011. Large-scale automated  
1024 synthesis of human functional neuroimaging data. *Nat Methods* **8**:665–670.  
1025 doi:10.1038/nmeth.1635
- 1026 Zanatta P, Toffolo GM, Sartori E, Bet A, Baldanzi F, Agarwal N, Golanov E. 2013. The human  
1027 brain pacemaker: Synchronized infra-slow neurovascular coupling in patients  
1028 undergoing non-pulsatile cardiopulmonary bypass. *NeuroImage* **72**:10–19.  
1029 doi:10.1016/j.neuroimage.2013.01.033
- 1030 Zelano C, Jiang H, Zhou G, Arora N, Schuele S, Rosenow J, Gottfried JA. 2016. Nasal Respiration  
1031 Entrain Human Limbic Oscillations and Modulates Cognitive Function. *J Neurosci*  
1032 **36**:12448–12467. doi:10.1523/JNEUROSCI.2586-16.2016  
1033  
1034
